# Supplementary material for: Identification of an emerging cucumber virus in Taiwan using Oxford nanopore sequencing technology
Source: PubMed Central journal article supplement (PMC9773502; doi:10.1186/s13007-022-00976-x), 2022-12-22
Supplement: 13007_2022_976_MOESM1_ESM.pdf [file 13007_2022_976_MOESM1_ESM.pdf]

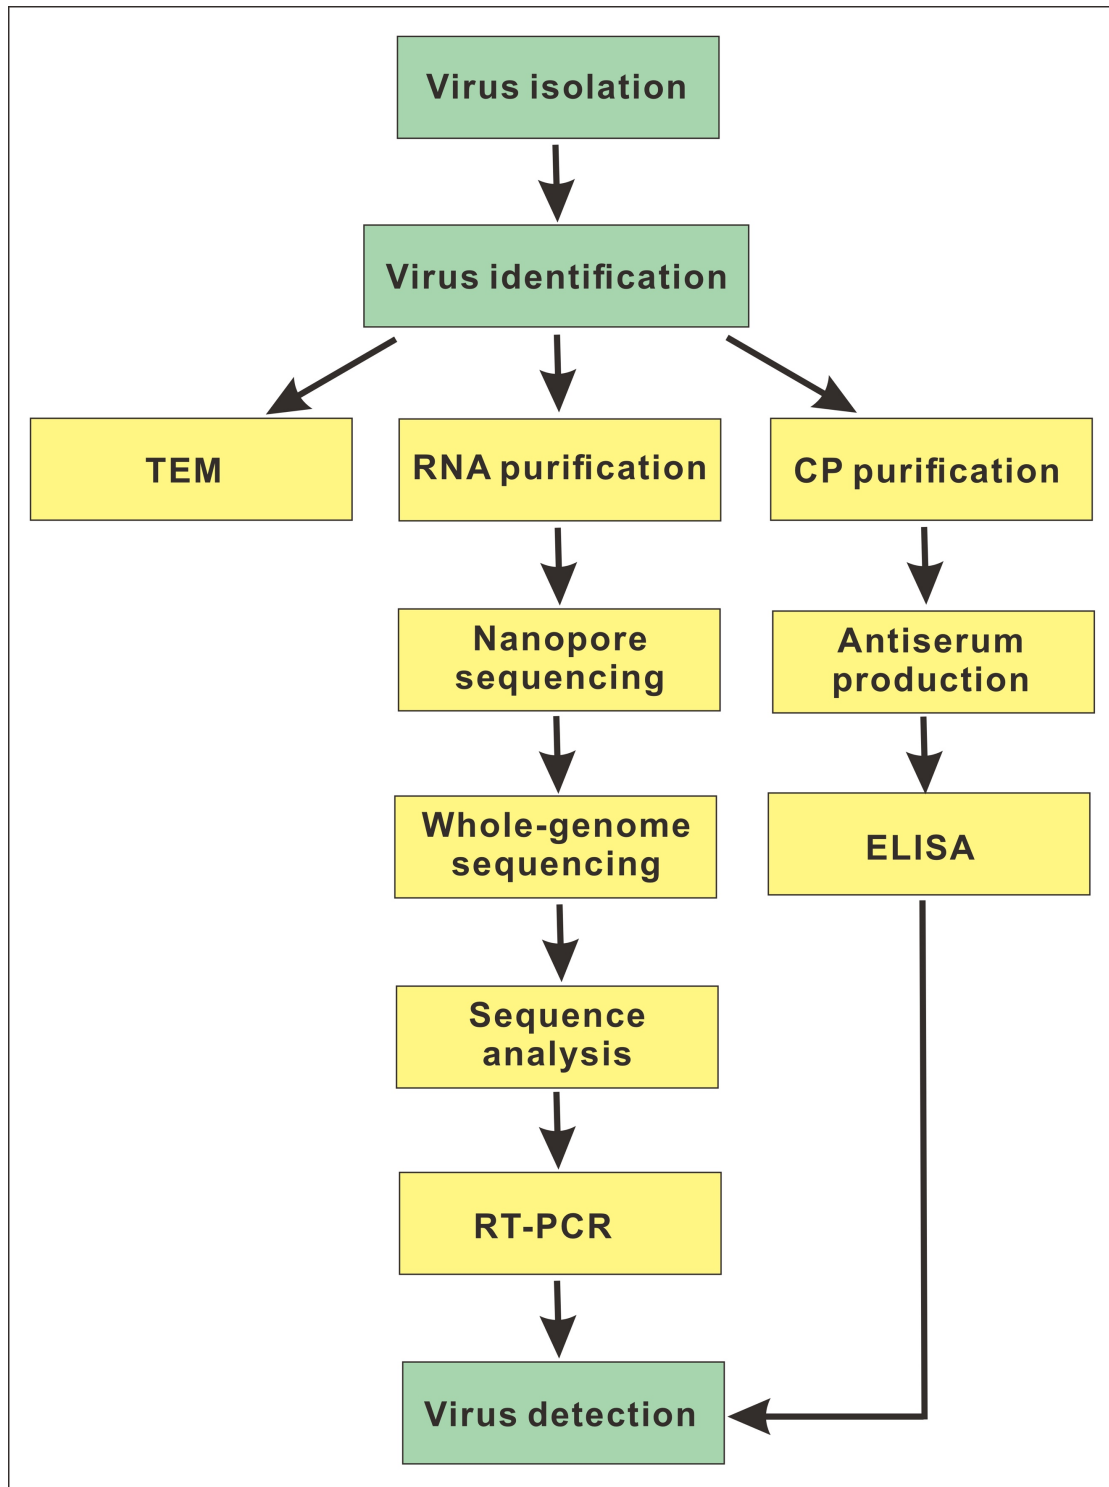

**Fig. S1.** Workflow for virus identification and detection in this study.
